# Supplementary material
Source: bioRxiv or medRxiv preprint supplement (https://medrxiv.org/highwire/filestream/82165/field_highwire_adjunct_files/0/2020.05.18.20105189-1.pdf)
Supplement: Supplementary file [file 2020.05.18.20105189-1.pdf]

## Supplementary Information

### High seroreactivity against SARS-CoV-2 Spike epitopes in a pre SARS-CoV-2 cohort: implications for antibody testing and vaccine design

Kaia Palm<sup>1\*#</sup>, Mariliis Jaago<sup>1,2\*</sup>, Annika Rähni<sup>1,2</sup>, Nadežda Pupina<sup>1</sup>, Arno Pihlak<sup>1</sup>, Helle Sadam<sup>1,2</sup>, Annela Avarlaid<sup>2</sup>, Anu Planken<sup>3</sup>, Margus Planken<sup>3</sup>, Liina Haring<sup>4</sup>, Eero Vasar<sup>5,6</sup>, Miljana Bačević<sup>7</sup>, France Lambert<sup>8</sup>, Eija Kalso<sup>9</sup>, Pirkko Pussinen<sup>10</sup>, Pentti J. Tienari<sup>11</sup>, Antti Vaheri<sup>12</sup>, Dan Lindholm<sup>13,14</sup>, Tõnis Timmusk<sup>1,2</sup> and Amir M Ghaemmaghami<sup>15#</sup>

<sup>1</sup>Protobios Llc, Tallinn, Estonia. Electronic address: [kaia@protobios.com](mailto:kaia@protobios.com)

<sup>2</sup>Department of Chemistry and Biotechnology, Tallinn University of Technology, Tallinn, Estonia;

<sup>3</sup>North Estonia Medical Centre Foundation, Tallinn, Estonia;

<sup>4</sup>Institute of Clinical Medicine, University of Tartu, Psychiatry Clinic of Tartu University Hospital, Estonia;

<sup>5</sup>Department of Physiology, Institute of Biomedicine and Translational Medicine, University of Tartu, Tartu, Estonia;

<sup>6</sup>Center of Excellence for Genomics and Translational Medicine, University of Tartu, Tartu, Estonia;

<sup>7</sup>Dental Biomaterial Research Unit (d-BRU), Faculty of Medicine, University of Liege, Liege, Belgium;

<sup>8</sup>Department of Periodontology and Oral Surgery, Faculty of Medicine, University of Liege, Belgium;

<sup>9</sup>Department of Anaesthesiology, Intensive Care and Pain Medicine, Helsinki University Hospital and Department of Pharmacology and SleepWell Research Programme, University of Helsinki, Helsinki, Finland;

<sup>10</sup>Oral and Maxillofacial Diseases, University of Helsinki and Helsinki University Hospital, Helsinki, Finland;

<sup>11</sup>Department of Neurology, Neurocenter, Helsinki University Hospital, and Translational Immunology Research Program, University of Helsinki, Helsinki, Finland;

<sup>12</sup>Department of Virology, Medicum, University of Helsinki, Finland;

<sup>13</sup>Department of Biochemistry and Developmental Biology, Faculty of Medicine, University of Helsinki, Helsinki, Finland;

<sup>14</sup>Minerva Foundation Institute for Medical Research, Helsinki, Finland;

<sup>15</sup>Immunology and Immuno-Bioengineering Group, School of Life Science, Faculty of Medicine and Health Sciences, University of Nottingham, Nottingham, United Kingdom. Electronic address: [Amir.Ghaemmaghami@nottingham.ac.uk](mailto:Amir.Ghaemmaghami@nottingham.ac.uk)

\*These authors contributed equally to the work.

# Correspondence to Kaia Palm or Amir Ghaemmaghami

Key words: SARS-CoV-2, immunoprfiling, antibody, seroreactivity, COVID-19, antigenic sin

## Supplementary Information

### Materials and Methods

#### Peptide antigen clustering

##### Non-discriminatory clustering (PD-CAD; MI; T2D; BC):

Within the PD-CAD cohort, the 96 subjects are grouped two-ways: 1) by CAD diagnosis; or by 2) PD diagnosis, resulting in 6 partially overlapping disease groups. Most abundant and shared peptide antigens were extracted for each of 6 groups, based on criteria: peptide must be present in  $\geq 10$  repeats in one sample; and must be present in  $\geq 10\%$  of samples within disease group (ranging from 2-4, based on group size). Resulting peptide sets were compared with random-generated sets of matching lengths to identify core sequence motifs more enriched in a given group, with the criteria: hypergeometric p-value  $< 10^{-8}$  or query/reference ratio  $> 10$ ; present in  $\geq 4$  distinct peptides;  $\geq 4$  fixed amino acid positions. As a result, distinct motif sequences were selected: PD-CAD (altogether 8088 distinct; gum-healthy (1668), gingivitis (3776), periodontitis (2155), no-CAD (1885), stable-CAD (906), ACS (1888)), MI (759), HC-MI (3260), and T2D (1169).

For myocardial infarction cohort analysis of the 50 subjects (MI), the control group of 50 healthy subjects was selected (MI\_HC). For further analysis, the most abundant peptide antigens were identified for MI and MI\_HC groups separately. Selected peptides were sequenced  $> 10$  times in one patient and presented at least in five MI or MI\_HC samples, correspondingly. For revealing recognition patterns, peptides from MI and MI\_HC groups were transformed to consensus sequences (motifs) via SPEXS2 software, using the criteria: hypergeometric p-value  $< 10^{-5}$ ; present in  $\geq 4$  distinct peptides;  $\geq 4$  fixed amino acid positions. As a result, 759 and 3260 distinct motifs were identified for MI and MI\_HC groups, respectively.

For Type 2 diabetes (T2D) with foot ulcer condition analysis, 25 subjects were selected. Most abundant and shared peptide antigens from MVA immunoprofiles were selected with criteria: peptide must be present in  $\geq 10$  repeats in one sample; and must be present in  $\geq 2$  samples. The resulting peptide set was compared with random-generated peptide set of same length and enriched motifs were identified using SPEXS2 algorithm, using hypergeometric p-value  $< 10^{-7}$  and motif to be present in  $\geq 4$  distinct peptides. As a result, 1169 motifs with  $\geq 4$  fixed amino acid positions were identified.

For patients with breast cancer (BC) and/or neuropathic pain (NP) condition, top 900 most abundant peptides from each sample separately were screened for motif sequences ( $\geq 5$  fixed amino acid positions). Motifs identified from  $\geq 2$  samples were extracted for further analysis and motifs more detected from NP group were selected. Additionally, peptides from a large non-

## Supplementary Information

unique dataset (shared in  $\geq 2$  samples) that did not contain any motifs identified by the above-mentioned approach, were examined separately. Peptides present in  $\geq 4$  samples ( $> 10\%$ ) in a given subgroup were extracted and common consensus motif sequences were identified with SPEXS2 tool (with hypergeometric p-value  $< 10^{-3}$ ,  $\geq 5$  fixed amino acid positions, motif present in  $\geq 4$  unique peptides). Altogether, 1014 distinct motif sequences were selected for further analysis.

### Discriminatory clustering (FEP; SZ; MS):

Within the FEP/SZ cohort case and control groups, most abundant and shared group-specific peptide antigens were extracted for each of the groups, based on criteria: the chosen peptide must be present in  $\geq 10$  repeats in one sample; and must be present in  $\geq 10\%$  of the samples within the given group. Core motif sequences were defined for each group independently as motifs that were more enriched when compared to 3 different reference sets: 1) random-generated reference set of same length, within-peptide scrambling; 2) within amino acid position- and across-peptide scrambling; and 3) the top abundant peptide set from the control group. Distinct motif sequences identified from SPEXS analyses were selected, based on criteria: hypergeometric p-value  $< 10^{-6}$  (FEP),  $< 10^{-5}$  (FEP\_Ctrl),  $< 10^{-8}$  (SZ), or  $< 10^{-6}$  (SZ\_Ctrl); present in  $\geq 4$  distinct peptides;  $\geq 4$  fixed amino acid positions. Motifs matching these criteria were selected for FEP (228), SZ (1785), FEP\_HC (1935), SZ\_HC (760).

Within the MS group, subgroups with or without initial optic neuritis diagnosis were analysed separately. The topmost abundant peptides from both subgroups ( $n=10$ ) were extracted with criteria: peptide count  $\geq 5$  in  $\geq 1$  sample. Using SPEXS2 the peptide sets were compared to age- and sex-matched control top peptide set using hypergeometric p-value  $< 10^{-7}$ ; motif to be present in  $\geq 4$  distinct peptides and have  $\geq 4$  fixed amino acid positions. As a result, 3500 distinct motif sequences were identified for MS group.

## Supplementary Information

### Supplementary Figures

**Extended Data Figure 1. Pearson correlation of  $R=0.985$  between MVA peptide antigen profiles of two replicates confirms reproducibility of MVA experiment.** R programming language and package “ggpubr” was used to calculate correlation and perform hypothesis test on the correlation coefficient ( $p < 2.2e-16$ ), and package “ggplot2” was used to visualize the results (Kassambara 2016; Wickham 2016).

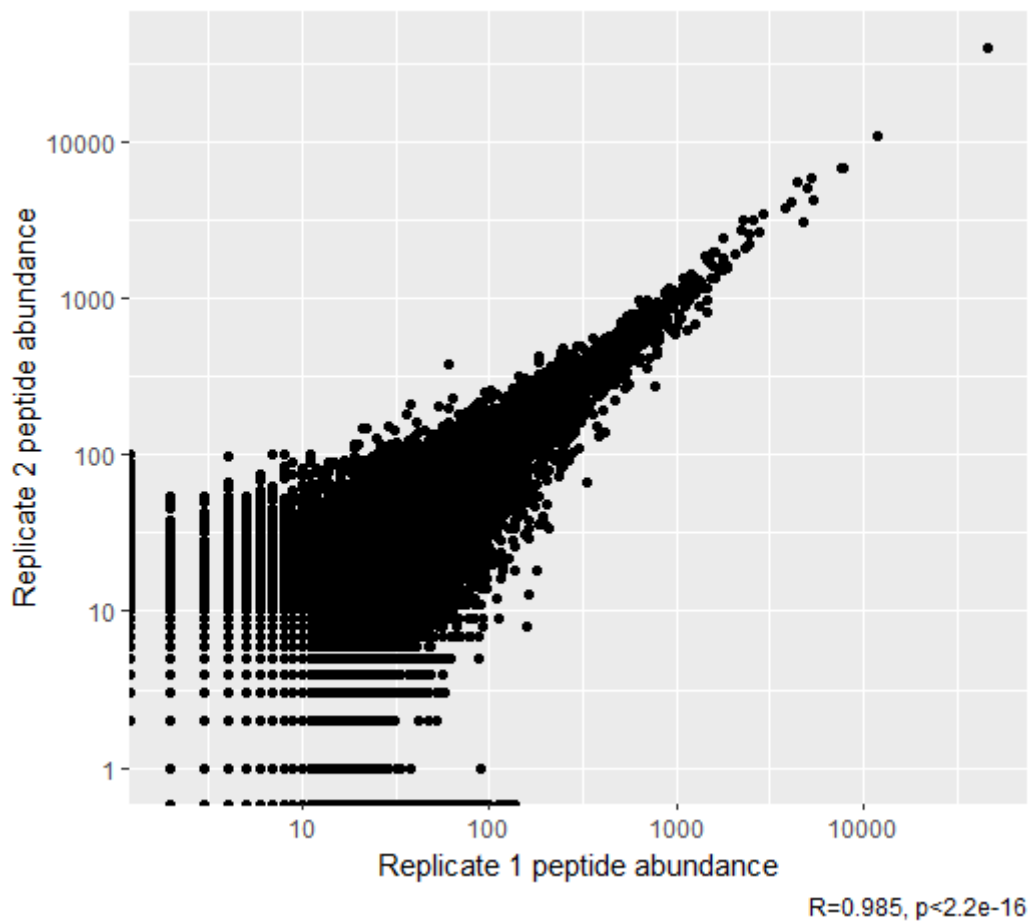

## Supplementary Information

### Extended Data Table 1. Predicted epitopes on SARS-CoV-2 S glycoprotein (P0DTC2).

Pattern represents one of motif patterns with exact alignment on the predicted epitope.

| Epitope number | Start position | End position | Sequence                    | Pattern     |
|----------------|----------------|--------------|-----------------------------|-------------|
| 1              | 26             | 34           | PAYTNSFTR                   | NSF.R       |
| 2              | 47             | 58           | VLHSTQDLFLPF                | V..S..D...P |
| 3              | 170            | 185          | YV SQPFLMDLEGKQGN           | L..K.GN     |
| 4              | 384            | 390          | PTKLNDL                     | PTKL..L     |
| 5              | 445            | 471          | VGGNYNYLYRLFRKSNLKPFERDISTE | K....DI.T   |
| 6              | 481            | 495          | NGVEGFNCYFPLQSY             | N.VE.F      |
| 7              | 514            | 523          | SFELLHAPAT                  | S...LH...T  |
| 8              | 570            | 582          | ADTTDAVRDPQTL               | PQTL        |
| 9              | 599            | 612          | TPGTNTSNQVAVLY              | GTN.S       |
| 10             | 650            | 660          | LIGAEHVNNSY                 | L.A.....SY  |
| 11             | 757            | 768          | GSFCTQLNRALT                | T.LNR       |
| 12             | 804            | 815          | QILPDPSKPSKR                | I.P...KP    |
| 13             | 858            | 869          | LTVLPPLLTDDEM               | V.P.L...E   |
| 14             | 937            | 944          | SLSSTASA                    | SL.S...A    |
| 15             | 1151           | 1161         | ELDKYFKNHST                 | EL....K...S |



## Supplementary Information

**Extended Data Table 2. Multiple linear regression analysis for exploratory data analysis.** R programming language and package “core” was used to perform multiple linear regression analysis. Multicollinearity of data was assessed using package “car” (Fox and Weisberg, 2019) and the variables used in the models showed minimal collinearity (variance inflation factor (VIF) < 5 or  $GVIF^{(1/2 \cdot Df)} < 5$  (generalized VIF)). The regression coefficient estimates for each considered categorical variable (1<sup>st</sup> column) are given for each epitope (columns 2-16) and significant predictors are marked accordingly: (.) p < 0.1, \* p < 0.05; \*\* p < 0.01; \*\*\* p < 0.001. HT – hypertension, CVD – cardiovascular disease, HC – healthy control

| Epitope                                                            | Ep.1     | Ep.2     | Ep.3  | Ep.4  | Ep.5      | Ep.6      | Ep.7    | Ep.8     | Ep.9      | Ep.10    | Ep.11    | Ep.12     | Ep.13 | Ep.14      | Ep.15    |
|--------------------------------------------------------------------|----------|----------|-------|-------|-----------|-----------|---------|----------|-----------|----------|----------|-----------|-------|------------|----------|
| <i>Model 1 (Age group + gender, n=524)</i>                         |          |          |       |       |           |           |         |          |           |          |          |           |       |            |          |
| Age group: 41<=x<=60                                               | 111.1(.) | 41.4(.)  | -12.6 | -32.3 | 37.4      | -76.7(.)  | 15.0    | 33.7     | -61.9     | 117.0    | -3.8     | -154.9*   | -66.7 | 137.9      | 105.0    |
| Age group: 61<=                                                    | 96.1     | 17.8     | 6.5   | 33.9  | 143.5***  | -178.8*** | 45.4    | 126.7*** | -228.0    | 112.7    | 58.6     | 2.9       | 35.5  | -157.8     | 109.5    |
| Gender: Male                                                       | -29.1    | 20.3     | -35.2 | 202.2 | 22.1      | -23.1     | -41.8   | 15.6     | -56.8     | -1115.6* | -35.9    | -82.4     | -94.2 | -50.4      | -1120.9* |
| <i>Model 2 (Age group + gender + HT + CVD, n=193)</i>              |          |          |       |       |           |           |         |          |           |          |          |           |       |            |          |
| HT: noHT                                                           | 141.2    | -67.7*** | 58.4  | 118.0 | -180.7**  | 40.4      | -65.3   | -91.2*   | -124.5(.) | -574.9   | 28.58    | -110.6    | 44.4  | 134.2      | -570.6   |
| CVD: HC                                                            | 42.6     | 26.6     | -2.5  | 20.8  | 57.9      | 53.8      | -67.1   | -99.9*   | 33.5      | 906.4    | -71.62   | -185.6    | -86.9 | -464.7(.)  | 905.6    |
| Gender: Male                                                       | -136.9   | -8.4     | -35.3 | 170.6 | 107.1(.)  | 22.8      | -26.3   | 72.4*    | 86.5      | -265.2   | -14.36   | -202.8(.) | -10.5 | 202.8      | -270.4   |
| Age group: 41<=x<=60                                               | 300.8    | 57.9*    | 53.9  | -62.8 | 57.4      | 20.2      | 23.2    | 135.2**  | 186.6(.)  | 551.7    | 143.2(.) | -47.2     | 4.5   | -272.1     | 538.2    |
| Age group: 61<=                                                    | 238.2    | 33.7     | 77.5  | 115.7 | 125.8     | -52.7     | 41.5    | 134.4*   | 117.3     | 1026.4   | 193.38*  | 18.3      | -66.6 | -434.8     | 1024.6   |
| <i>Model 3 (Age group + gender + HT + CVD + tobacco use, n=96)</i> |          |          |       |       |           |           |         |          |           |          |          |           |       |            |          |
| HT: noHT                                                           | 63.0     | -60.5*   | 37.7  | -68.8 | -259.4*   | 27.6      | 45.2    | -5.8     | -142.6    | -316.0   | 48.4     | 27.3      | 73.8  | 27.0       | -306.5   |
| CVD: HC                                                            | -66.7    | 71.6*    | -12.6 | -44.1 | 116.7     | 127.3     | -77.2** | -71.2    | 88.8      | 434.9    | -8.4     | -298.9    | -80.9 | -368.3     | 434.6    |
| Gender: Male                                                       | 1.2      | -27.5    | 12.0  | 107.7 | 113.6     | 131.5     | 20.6    | 16.8     | 55.7      | 353.3    | 7.4      | -490.1*   | 41.6  | 683.7(.)   | 301.3    |
| Age group: 41<=x<=60                                               | 97.9     | 39.2     | 62.5  | -5.1  | 203.8     | 147.3     | 6.1     | 70.5     | 434.7     | 576.3    | -70.6    | -416.5    | 190.7 | -2355.2    | 307.5    |
| Age group: 61<=                                                    | 243.7    | 2.7      | 76.8  | 64.6  | 239.8     | 20.4      | 2.9     | 15.9     | 319.6     | 925.3    | -178.9   | -373.3    | 69.7  | -2771.6(.) | 670.4    |
| Tobacco: No                                                        | 210.6(.) | 30.6     | 5.2   | 102.1 | -156.6    | 69.0      | -53.6   | 9.5      | -11.1     | -255.6   | -9.5     | -418.9(.) | 36.8  | 147.1      | -270.7   |
| Tobacco: Smoking                                                   | 24.6     | 70.9(.)  | -35.3 | 31.6  | -353.9(.) | 80.9      | -13.5   | 9.3      | 25.0      | 586.3    | -104.3   | -399.2    | 74.9  | 960.2(.)   | 551.4    |

## Supplementary Information

**Extended Data Figure 3. Response against predicted S epitopes across age groups.** Kruskal-Wallis test for overall difference of groups. Pair-wise comparisons with Mann-Whitney U test, ns  $p > 0.05$ , \*  $p < 0.05$ , \*\*  $p < 0.01$ , \*\*\*  $p < 0.001$ . Group sizes:  $\leq 40$  years ( $n=186$ ),  $41 \leq x \leq 60$  years ( $n=188$ ),  $61 \leq$  years ( $n=150$ ).

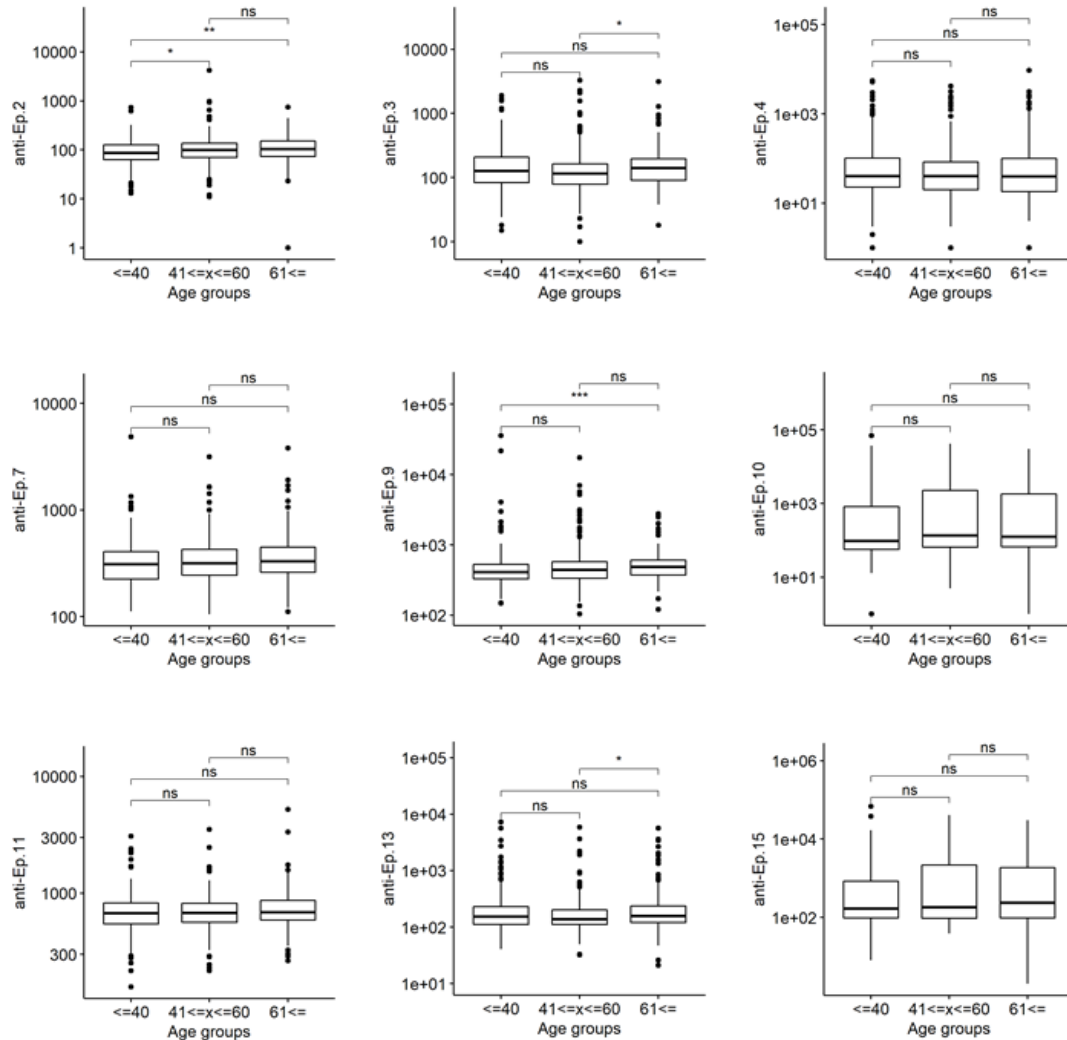



## Supplementary Information

**Extended Data Figure 4. Response against S epitopes in hypertension (HT) as an intensity plot.** Immune response to HT-associated S epitopes was visualized across subjects (*in columns*) without HT (noHT, n=112) or with HT (n=81). Motifs aligned to predicted S epitopes are *in rows*. Motif-containing peptide antigen abundances in individual immunoprofiles are color-coded in  $\log_{10}$ . Subject age is color-coded under the intensity plot.

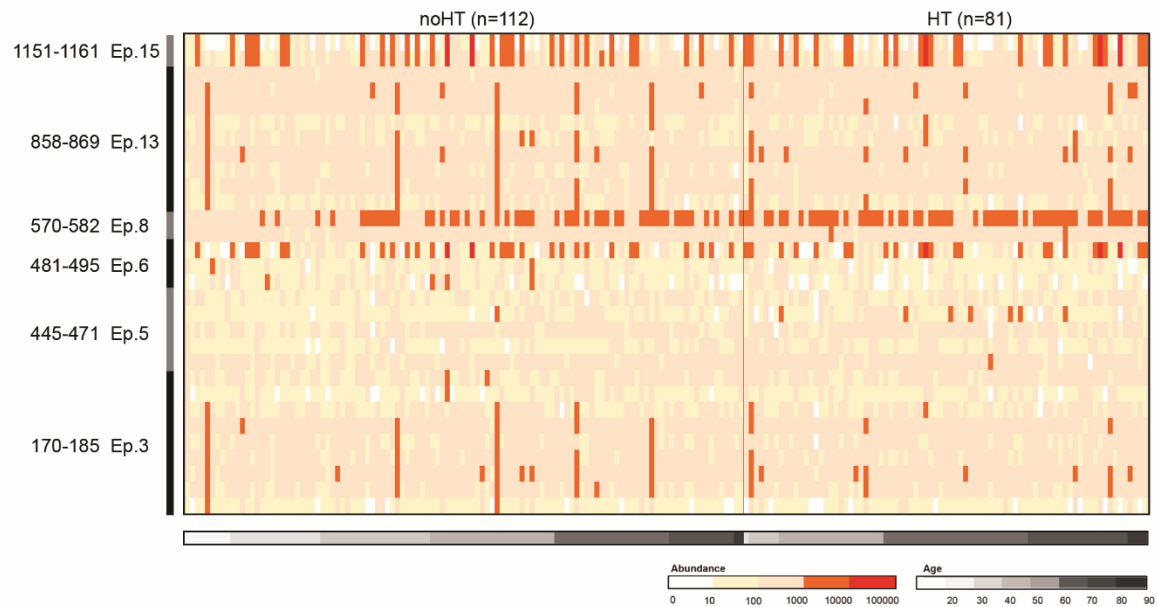

## Supplementary Information

**Extended Data Figure 5. Response against predicted S epitopes in hypertension (HT).** Pair-wise comparisons with Mann-Whitney U test, ns  $p > 0.05$ , \*  $p < 0.05$ , \*\*  $p < 0.01$ , \*\*\*  $p < 0.001$ , \*\*\*\*  $p < 0.0001$ . Group sizes: noHT (n=122), HT (n=81)

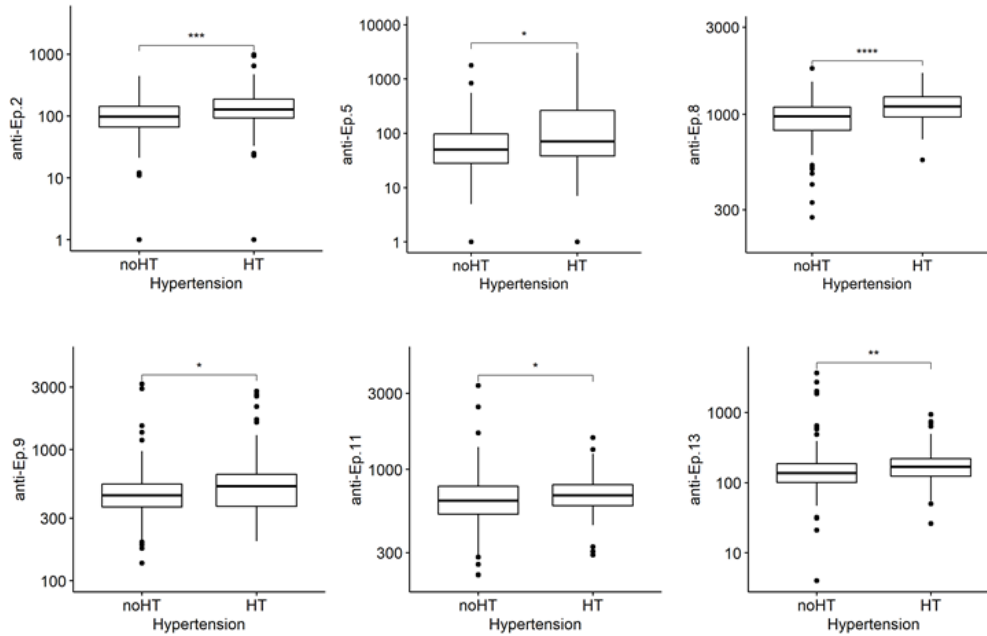

## Supplementary Information

**Extended Data Figure 6. Response against predicted S epitopes across hypertension and gender groups.** Kruskal-Wallis test for overall difference of groups. Pair-wise comparisons with Mann-Whitney U test, ns  $p > 0.05$ , \*  $p < 0.05$ , \*\*  $p < 0.01$ , \*\*\*  $p < 0.001$ . Group sizes: noHT, M (n=71), noHT, F (n=43), HT, M (n=48), HT, F (n=33).

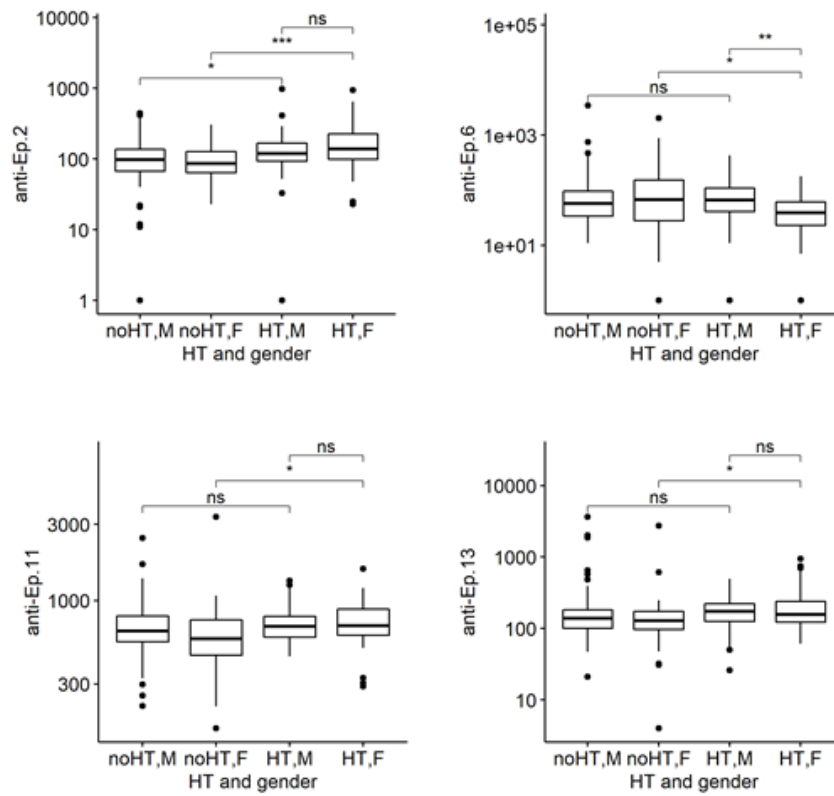

## Supplementary Information

**Extended Data Figure 7. Response against predicted S epitopes across cardiovascular disease (CAD or MI) and gender groups.** Kruskal-Wallis test for overall difference of groups. Pair-wise comparisons with Mann-Whitney U test, ns  $p > 0.05$ , \*  $p < 0.05$ , \*\*  $p < 0.01$ , \*\*\*  $p < 0.001$ . Group sizes: HC, M (n=40), HC, F (n=49), Case, M (n=79), Case, F (n=27)

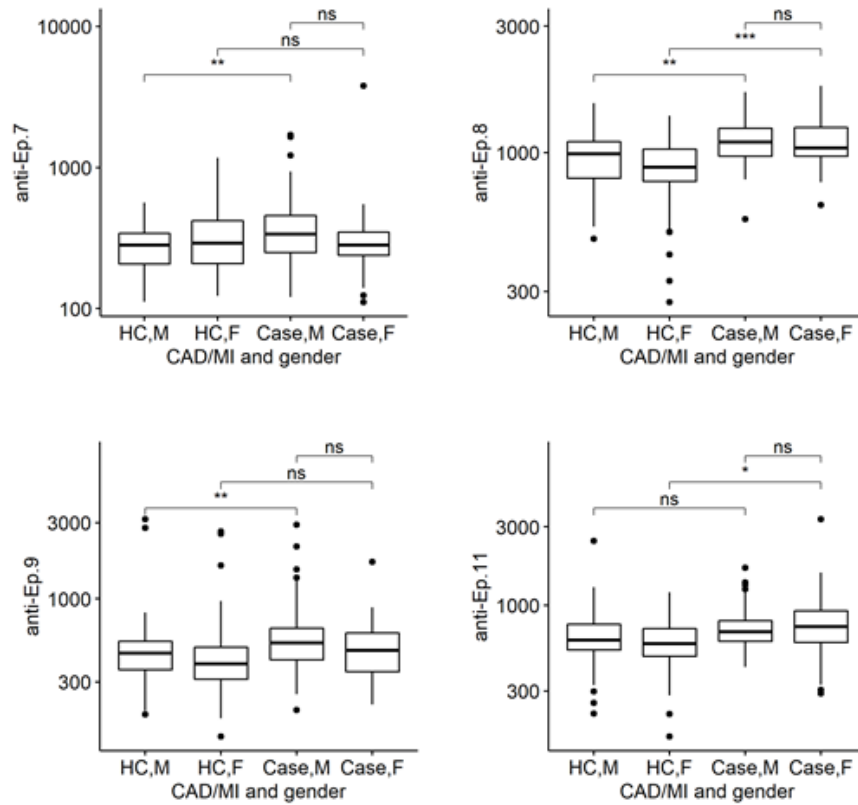

## Supplementary Information

**Extended Data Figure 8. Sequence alignment of Spike glycoproteins (S) from beta-coronaviruses SARS-CoV-2, SARS-CoV, OC43 and HKU1, and the sequence similarity of predicted S epitopes with common viral pathogens.** Predicted Ep.5 of S RBD, for which high immune response was associated with age and HT in males, shared sequence similarity with SARS-CoV S (70% amino acid identity) and with human cytomegalovirus (HCMV, 50% identity) and human herpesvirus 6B (HHV-6B, 50% identity). Although Ep.12 of SARS CoV-2 shares sequence identity to multiple already described immune epitopes of highly prevalent herpesviruses HCMV, Epstein-Barr virus (EBV, human herpesvirus 4), human herpesvirus 1 (HHV-1), and human herpesvirus 2 (HHV-2) with identity between 42-50%, all these share the same core pattern of P.P.KP. Predicted epitope sequences are depicted with white text on black background – letters stand for exact amino acid positions in the epitope, whereas dots (.) represent any given amino acid. Conserved amino acid positions between SARS-CoV-2 S protein and reference proteins from UniProtKB database are depicted with asterisks (\*), absent amino acids with hyphen (-), and amino acids matching the S protein motifs are coloured dark blue. The known epitopes of aligned pathogen proteins from Immune Epitope Database (IEDB) are marked light blue. Aligned reference protein UniProtKB identification codes, alignment information and IEDB epitope reference IDs can be found in Extended Data Table 2.

|                                     |                                     | Epitope 1             | Epitope 2                               | Epitope 3                     | Epitope 4                       | Epitope 5                                 | Epitope 6                                       | Epitope 7                                         |                                                   |
|-------------------------------------|-------------------------------------|-----------------------|-----------------------------------------|-------------------------------|---------------------------------|-------------------------------------------|-------------------------------------------------|---------------------------------------------------|---------------------------------------------------|
|                                     | Protein ID                          | P . Y . N S F . R     | V . S . D L . L P F Y                   | V V S Q P . L M D L E K . G N | P T K L . L                     | V . G N Y N Y L R L K . . E R D I . T E N | N . V E F . . Y . . L . S Y S . . . L L H . . T |                                                   |                                                   |
| Spike protein                       | SARS-CoV-2                          | P0DTC2                | P A Y T N S F T R                       | V L H S T Q D L F L P F Y     | V V S Q P F L M D L E G K Q G N | P T K L N D L V                           | G G N Y N Y L R L K P F E R D I S T E N         | N G V E G F N C Y F P L Q S Y S F E L L H A P A T |                                                   |
|                                     | SARS-CoV                            | P59594                | N . H T . S M . . Y L . .               | I . D A * S L V S E S .       | A . . . . .                     | S T . . . . .                             | K * . Y R * . . . . . N V T                     | P . P A L * . . W * . N D . * . * . N * . . .     |                                                   |
|                                     | Coronavirus OC43                    | P36334                | I S * V T N G L T                       | * F L N G A K G S V           | - . - R N * T Y V S A D . . .   | A A I Y G M                               | P S T W K R F G F                               | * R P A V Y A Q H                                 | K L T N Y L T * D . . I T F T A N F I . . N S G L |
|                                     | Coronavirus HKU1                    | Q0ZME7                | R I S V V . L G L T                     | * L F * G A K G S I           | - . - K N * T Y N V S A D . . . | K S I F G S                               | I P S S W R R Y G F                             | - . - V Y * D H                                   | A D T K Y R H * D L * I S T * N F I F N S G L     |
| Pathogens                           | Human cytomegalovirus               |                       | L W V . . . W                           | G E R Q L L T T I S M L       | D V A                           | H Y V . . K L I I * V . . Q A L . .       | A . . P T K K P L K . . A N . .                 | A W T . . * A G                                   |                                                   |
|                                     | Epstein-Barr virus                  |                       | Q H R R L L T L W S V A A               | D . . . . .                   | S S                             |                                           |                                                 |                                                   |                                                   |
|                                     | Varicella-zoster virus              |                       | Y S H G H S                             | L N R T C G T H D V C         | D * H                           | L H A L L L L                             |                                                 |                                                   |                                                   |
|                                     | Vaccinia virus                      |                       | V Y * M V N H I E H N K S E F L S D K I | K . K I                       | R T R R E F F Q                 |                                           |                                                 |                                                   |                                                   |
|                                     | Human herpesvirus 6B                |                       | C T A V T G G D C S N Q A L E S R S T   |                               |                                 | L S L S . . . L                           | * . . F I V Q L S T . N D I                     | A * . . . E E L S                                 |                                                   |
|                                     | Human papillomavirus 11             |                       | F G L F V I R                           | T V G E V P D * L V * G       |                                 |                                           |                                                 |                                                   |                                                   |
|                                     | Human respiratory syncytial virus A |                       |                                         |                               |                                 | K P T                                     |                                                 | D * . . . N V N A                                 |                                                   |
|                                     | Coronavirus NL63                    |                       |                                         | N N I N S F A E L S L         |                                 | Q L V V V C                               |                                                 |                                                   |                                                   |
|                                     | Coronavirus HKU1                    |                       |                                         |                               |                                 | V W V A E S                               |                                                 |                                                   |                                                   |
|                                     | Human adenovirus C                  |                       |                                         |                               |                                 | R Q K                                     |                                                 |                                                   |                                                   |
|                                     | Human papillomavirus 6A             | Q84293                | F G L F I I R                           |                               |                                 |                                           |                                                 |                                                   |                                                   |
|                                     | Human papillomavirus 6B             | P03113                | F G L F I I R                           |                               |                                 |                                           |                                                 |                                                   |                                                   |
|                                     | Human papillomavirus 1              | P03118                |                                         |                               |                                 | K G A Q K C                               |                                                 |                                                   |                                                   |
|                                     | Human papillomavirus 10             | P36747                |                                         | N T T S L S S T S T Y         |                                 |                                           |                                                 |                                                   |                                                   |
|                                     | Human papillomavirus 18             | P06463                |                                         |                               |                                 | N T L L L C                               |                                                 |                                                   |                                                   |
| Human papillomavirus 22             | P50796                              |                       |                                         |                               |                                 | * . . D S R S Q L V I G P                 |                                                 |                                                   |                                                   |
| Human respiratory syncytial virus B | O36634                              |                       |                                         |                               |                                 |                                           | D * . . . N V N T                               |                                                   |                                                   |
| Rotavirus A                         | P11194                              |                       |                                         |                               |                                 |                                           | S * . . . G Q Q A                               |                                                   |                                                   |
| Human adenovirus A                  | P36855                              |                       |                                         |                               |                                 |                                           |                                                 |                                                   |                                                   |
|                                     | Protein ID                          | A . T . . R . P Q T L | T . G T N T S N . Q V A V L Y           | L I G A E H V N N S Y         | G S F C T Q L N R A L T         | Q I L P . P . K P S K R                   | L T V L P . L L T D E M                         | S L S S T A S A                                   |                                                   |
| Spike protein                       | SARS-CoV-2                          | P0DTC2                | A D T T D A V R D P Q T L               | T P G T N T S N Q V A V L Y   | L I G A E H V N N S Y           | G S F C T Q L N R A L T                   | Q I L P D P S K P S K R                         | L T V L P L L T D E M                             | S L S S T A S A                                   |
|                                     | SARS-CoV                            | P59594                | S * F L * S * . . K K S                 | F H . . A S E * . . . .       | V V N * . . D T                 | . . . . .                                 | . . . . .                                       | . . . . .                                         | . . . . .                                         |
|                                     | Coronavirus OC43                    | P36334                | N G N L Y G F . . Y I I N               | F H . . A S E P * L * F       | V V N Y N S T S V Q             | . . * D N I A I * .                       | P V * S E C * . A S                             | I K . . . . S E N Q                               | G F D A * N * . . . Q W * . * Q . .               |
|                                     | Coronavirus HKU1                    | Q0ZME7                | N G N I I G F K * F L N                 | F Y . . Q N S S P * L * F     | V L N V N L T S V S             | T * * D N I S I * N                       | S L * S Q C G S - S                             | I K . . . . I S E T Q                             | G F T A * N * . . . S L W * . . . .               |
| Pathogens                           | Human cytomegalovirus               |                       | T G R S S S P R                         | H Y Y . . . C S P Q F M C     |                                 | C A * T G E R S S                         | S P G . . T E E E E                             | E . . F S S * . .                                 |                                                   |
|                                     | Epstein-Barr virus                  |                       | S G * E * V T S I                       |                               |                                 | T G R S . . . W M                         | P C K * . . P G Q                               | . . . E G S * . .                                 |                                                   |
|                                     | Varicella-zoster virus              |                       |                                         | P T . . . Y G T L E L * .     | L Y * R A S E                   | N E L Y R . . . M Q                       |                                                 | . . . F * S A . .                                 |                                                   |
|                                     | Vaccinia virus                      |                       |                                         |                               | * D H * . . Q Y K I             | M I T E F Y A S                           |                                                 | . . . R * H * R . .                               |                                                   |
|                                     | Human herpesvirus 6B                |                       | K * . Y L E . A . . K R                 | E * L . . . L R S T N H I     |                                 |                                           |                                                 |                                                   |                                                   |
|                                     | Human papillomavirus 11             |                       |                                         |                               |                                 |                                           |                                                 |                                                   |                                                   |
|                                     | Human respiratory syncytial virus A |                       |                                         |                               |                                 |                                           |                                                 |                                                   |                                                   |
|                                     | Human herpesvirus 1                 |                       |                                         |                               |                                 |                                           |                                                 |                                                   |                                                   |
|                                     | Human herpesvirus 2                 |                       |                                         |                               |                                 |                                           |                                                 |                                                   |                                                   |
|                                     | Coronavirus NL63                    |                       |                                         |                               |                                 |                                           |                                                 |                                                   |                                                   |
|                                     | Human adenovirus C                  |                       |                                         |                               |                                 |                                           |                                                 |                                                   |                                                   |
|                                     | Coronavirus 229E                    | P15423                | D * I D * S * F S . . P Q               |                               |                                 |                                           |                                                 |                                                   |                                                   |
|                                     | Human adenovirus B                  | P03256                |                                         |                               |                                 |                                           |                                                 |                                                   |                                                   |
|                                     | Rhinovirus A                        | P07210                |                                         |                               |                                 |                                           |                                                 |                                                   |                                                   |

## Supplementary Information

**Extended Data Table 3. Additional information about the sequence alignment of SARS-CoV-2 Spike glycoprotein and UniProtKB human virus reference proteins.** The exact UniProtKB database identification codes of an aligned protein, its parental virus and virus strains are shown. The number of the first amino acid in the aligned reference protein is depicted along with identification numbers of known IEDB epitopes for the same pathogen protein. NA – not applicable, IEDB – Immune Epitope Database.

| Predicted Spike glycoprotein (S) epitope | Virus                               | Strain     | Protein ID | Alignment start on protein | Matching epitope from IEDB (ID) |
|------------------------------------------|-------------------------------------|------------|------------|----------------------------|---------------------------------|
| 1                                        | Human cytomegalovirus               | AD169      | P16799     | 329                        |                                 |
| 1                                        | Vaccinia virus                      | Copenhagen | P20508     | 245                        |                                 |
| 2                                        | Human herpesvirus 6B                | NA         | IEDB       | NA                         | 738622                          |
| 2                                        | Human papillomavirus 11             | NA         | P04014     | 216                        |                                 |
| 2                                        | Human papillomavirus 6A             | NA         | Q84293     | 216                        |                                 |
| 2                                        | Human papillomavirus 6B             | NA         | P03113     | 216                        |                                 |
| 2                                        | SARS-CoV                            | NA         | P59594     | 51                         | 65159                           |
| 2                                        | Vaccinia virus                      | Copenhagen | P68441     | 507                        |                                 |
| 2                                        | Varicella-zoster virus              | Dumas      | P09270     | 854                        |                                 |
| 3                                        | Coronavirus HKU1                    | N5         | Q0ZME7     | 1221                       |                                 |
| 3                                        | Epstein-Barr virus                  | AG876      | P0C723     | 260                        |                                 |
| 3                                        | Human cytomegalovirus               | AD169      | P16729     | 1136                       |                                 |
| 3                                        | Human herpesvirus 6B                | Z29        | Q9QJ26     | 1303                       | 738619                          |
| 3                                        | Human papillomavirus 10             | NA         | P36747     | 378                        |                                 |
| 3                                        | Human papillomavirus 11             | NA         | P04012     | 263                        | 112499                          |
| 3                                        | Vaccinia virus                      | Copenhagen | P68694     | 974                        |                                 |
| 3                                        | Varicella-zoster virus              | Dumas      | P09296     | 247                        |                                 |
| 4                                        | Epstein-Barr virus                  | NA         | IEDB       | NA                         | 694177                          |
| 4                                        | Human adenovirus C                  | Serotype 5 | P04493     | 73                         |                                 |
| 4                                        | Human cytomegalovirus               | AD169      | IEDB       | NA                         | 17424                           |
| 4                                        | Human respiratory syncytial virus A | A2         | IEDB       | NA                         | 47690                           |
| 4                                        | SARS-CoV                            | Tor2       | P59594     | 371                        | 5019                            |
| 4                                        | Vaccinia virus                      | Copenhagen | P0CK20     | 44                         | 60525                           |
| 4                                        | Varicella-zoster virus              | Dumas      | P09261     | 273                        |                                 |
| 5                                        | Coronavirus HKU1                    | isolate N1 | P0C6X2     | 2173                       |                                 |
| 5                                        | Coronavirus NL63                    | NA         | P0C6U6     | 3347                       |                                 |
| 5                                        | Human cytomegalovirus               | Merlin     | Q6SWC3     | 19                         |                                 |
| 5                                        | Human papillomavirus 1              | NA         | P03118     | 323                        |                                 |
| 5                                        | Human papillomavirus 18             | NA         | P06463     | 95                         | 111246                          |
| 5                                        | SARS-CoV                            | Tor2       | P59594     | 432                        | 66460                           |
| 5                                        | Vaccinia virus                      | Copenhagen | P20643     | 138                        |                                 |
| 5                                        | Varicella-zoster virus              | Dumas      | P09263     | 684                        |                                 |
| 5                                        | Human cytomegalovirus               | AD169      | P09695     | 92                         |                                 |
| 5                                        | Human herpesvirus 6B                | Z29        | Q9QJ27     | 11                         | 872103                          |

## Supplementary Information

|    |                                     |                                               |        |      |        |
|----|-------------------------------------|-----------------------------------------------|--------|------|--------|
| 5  | Rotavirus A                         | isolate<br>RVA/Human/Italy/VA70/1975/G4P1A[8] | P11194 | 652  |        |
| 6  | Human cytomegalovirus               | AD169                                         | P16809 | 27   |        |
| 6  | Human herpesvirus 6B                | Z29                                           | P52544 | 124  |        |
| 6  | Human papillomavirus 22             | NA                                            | P50796 | 431  |        |
| 7  | Human adenovirus A                  | Serotype 31                                   | P36855 | 182  |        |
| 7  | Human cytomegalovirus               | AD169                                         | P16785 | 371  |        |
| 7  | Human herpesvirus 6B                | Z29                                           | Q9QJ38 | 232  | 859354 |
| 7  | Human respiratory syncytial virus A | A2                                            | P03420 | 509  | 96860  |
| 7  | Human respiratory syncytial virus B | B1                                            | O36634 | 509  |        |
| 8  | Epstein-Barr virus                  | AG876                                         | Q1HVG4 | 376  | 696380 |
| 8  | Human adenovirus C                  | Serotype 5                                    | P12537 | 413  |        |
| 8  | Human cytomegalovirus               | NA                                            | P07387 | 455  |        |
| 8  | Human herpesvirus 6B                | Z29                                           | Q9QJ37 | 254  | 871643 |
| 9  | Coronavirus 229E                    | NA                                            | P15423 | 58   |        |
| 9  | Human cytomegalovirus               | AD169                                         | P16719 | 95   |        |
| 9  | Human herpesvirus 2                 | HG52                                          | P89475 | 234  | 741803 |
| 9  | Human herpesvirus 6B                | Z29                                           | P52549 | 625  | 739289 |
| 9  | SARS-CoV                            | NA                                            | P59594 | 585  | 71190  |
| 9  | Varicella-zoster virus              | Dumas                                         | P09258 | 63   |        |
| 10 | SARS-CoV                            | Tor2                                          | P59594 | 636  | 1460   |
| 10 | Vaccinia virus                      | Copenhagen                                    | P68439 | 721  |        |
| 10 | Varicella-zoster virus              | Dumas                                         | P09245 | 1082 |        |
| 11 | Coronavirus NL63                    | NA                                            | P0C6X5 | 1528 |        |
| 11 | Epstein-Barr virus                  | B95-8                                         | P25939 | 381  |        |
| 11 | Human herpesvirus 2                 | HG52                                          | P89466 | 7    | 154180 |
| 11 | SARS-CoV                            | Tor2                                          | P59594 | 739  | 39023  |
| 11 | Varicella-zoster virus              | Dumas                                         | Q65ZG0 | 47   |        |
| 12 | Epstein-Barr virus                  | AG876                                         | Q1HVG4 | 304  | 694044 |
| 12 | Human cytomegalovirus               | AD169                                         | P14334 | 13   |        |
| 12 | Human herpesvirus 1                 | 17                                            | P06477 | 53   | 742197 |
| 12 | Human herpesvirus 2                 | NA                                            | IEDB   | NA   | 1393   |
| 12 | SARS-CoV                            | NA                                            | P59594 | 786  | 17816  |
| 13 | Epstein-Barr virus                  | AG876                                         | Q1HVG8 | 547  |        |
| 13 | Human adenovirus B                  | Serotype 7                                    | P03256 | 102  |        |
| 13 | Human cytomegalovirus               | AD169                                         | IEDB   | NA   | 194708 |
| 13 | Human herpesvirus 1                 | 17                                            | P10211 | 806  | 741877 |
| 13 | Human herpesvirus 2                 | HG52                                          | P08666 | 803  | 741773 |
| 13 | Human herpesvirus 6B                | Z29                                           | P52459 | 24   | 873012 |
| 13 | Human papillomavirus 11             | NA                                            | P04015 | 56   | 145356 |
| 14 | Epstein-Barr virus                  | B95-8                                         | P03186 | 701  |        |
| 14 | Human cytomegalovirus               | AD169                                         | P16724 | 259  |        |
| 14 | Human herpesvirus 6B                | Z29                                           | Q9PX69 | 140  | 739012 |
| 14 | Vaccinia virus                      | Copenhagen                                    | P21047 | 362  |        |
| 15 | Human respiratory syncytial virus A | A2                                            | P28887 | 2147 |        |

## Supplementary Information

|    |                    |                                         |        |      |       |
|----|--------------------|-----------------------------------------|--------|------|-------|
| 15 | Human rhinovirus A | Serotype 89<br>(strain 41467-<br>Gallo) | P07210 | 1710 |       |
| 15 | SARS-CoV           | NA                                      | P59594 | 1133 | 11740 |

## Supplement References

Chowdhury, R., & Maranas, C. D. (2020). From directed evolution to computational enzyme engineering—A review. *AIChE Journal*, 66(3), [e16847]. <https://doi.org/10.1002/aic.16847>

Kassambara, A. (2016). *ggcorrplot: Visualization of a Correlation Matrix using 'ggplot2'*. R package version 0.1.1.9000.

Wickham H (2016). *ggplot2: Elegant Graphics for Data Analysis*. Springer-Verlag New York. ISBN 978-3-319-24277-4, <https://ggplot2.tidyverse.org>.

Yuan, M., Wu, N.C., Zhu, X., Lee, C.-C.D., So, R.T.Y., Lv, H., Mok, C.K.P., Wilson, I.A., 2020. A highly conserved cryptic epitope in the receptor-binding domains of SARS-CoV-2 and SARS-CoV. *Science*. <https://doi.org/10.1126/science.abb7269>

Fox J, Weisberg S (2019). *An R Companion to Applied Regression*, Third edition. Sage, Thousand Oaks CA. <https://socialsciences.mcmaster.ca/jfox/Books/Companion/>.
